# Supplementary material for: Multilayer Perceptron-Based Real-Time Intradialytic Hypotension Prediction Using Patient Baseline Information and Heart-Rate Variation
Source: MDPI journal article supplement (doi:10.3390/ijerph191610373), 2022-08-20
Supplement: s1 [file s1]

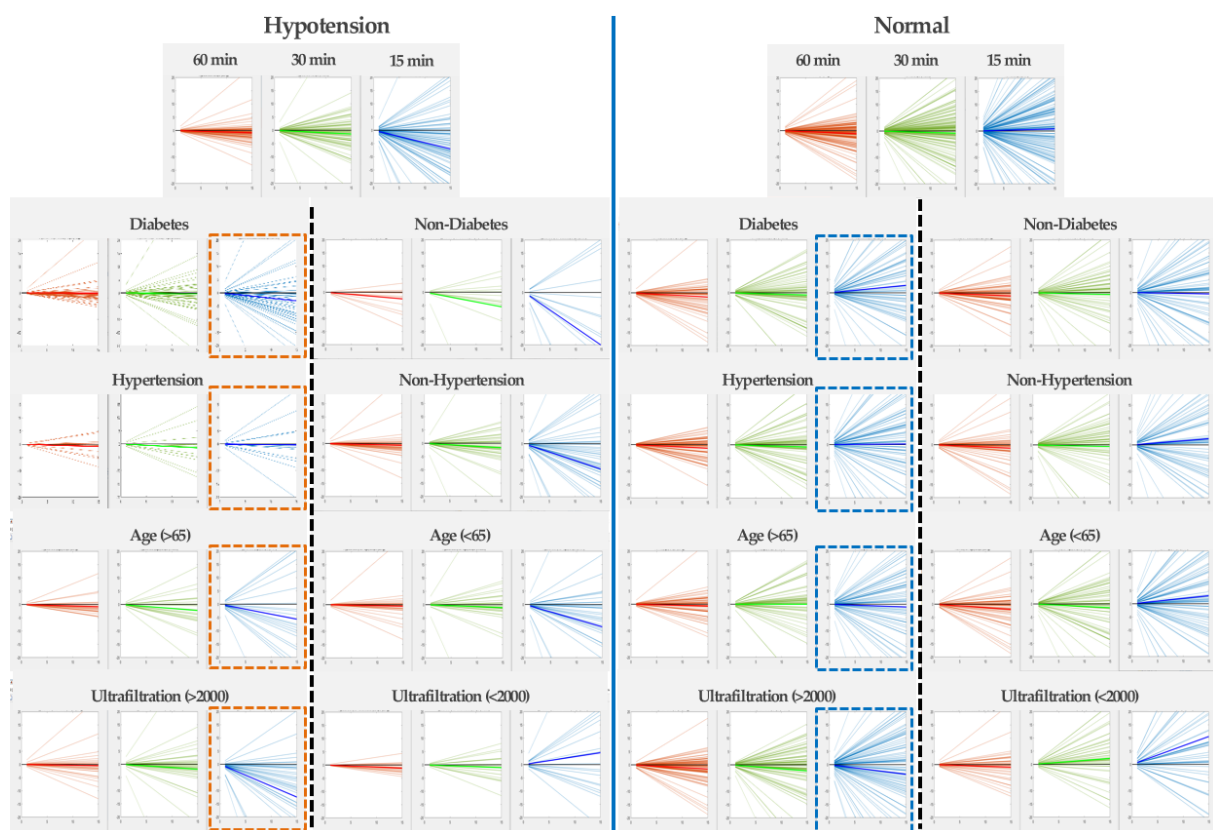

**Figure S1.** Changes in HR slope for IDH and normal (non-IDH) patients according to 60 min data by patient baseline information before the onset of IDH.

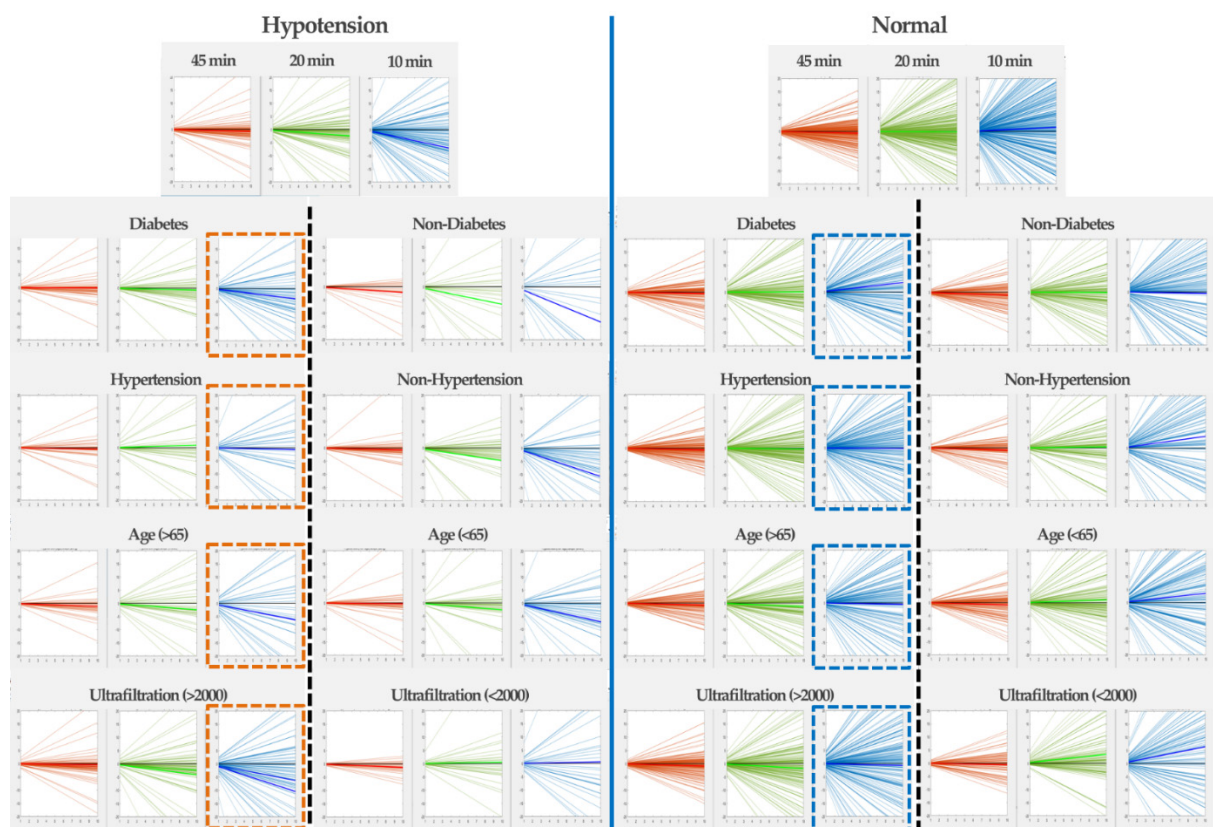

**Figure S2.** Changes in HR slope for IDH and normal (non-IDH) patients according to 45 min data by patient baseline information before the onset of IDH.

**Table S1.** HR slope values for IDH and normal (non-IDH) patients according to patient baseline information 60 min before IDH onset.

|                                 | Hypotension     |          |          |                     |          |          | Normal          |          |          |                     |          |          |
|---------------------------------|-----------------|----------|----------|---------------------|----------|----------|-----------------|----------|----------|---------------------|----------|----------|
|                                 | 60min           | 30min    | 15min    | 60min               | 30min    | 15min    | 60min           | 30min    | 15min    | 60min               | 30min    | 15min    |
| Underlying disease <sup>1</sup> | Diabetes        |          |          | Non-diabetes        |          |          | Diabetes        |          |          | Non-diabetes        |          |          |
| Mean slope                      | -0.00872        | -0.02342 | -0.2023  | -0.16395            | -0.36813 | -1.3420  | -0.10618        | -0.05459 | 0.18847  | -0.07546            | -0.04555 | -0.03470 |
| Num. of positive slopes         | 13              | 16       | 12       | 3                   | 6        | 4        | 28              | 39       | 45       | 36                  | 56       | 53       |
| Num. of negative slopes         | 36              | 33       | 37       | 13                  | 10       | 12       | 55              | 44       | 38       | 47                  | 27       | 30       |
| % of negative slopes            | 73.47           | 67.35    | 75.51    | 81.25               | 62.50    | 75.00    | 66.27           | 53.01    | 45.78    | 56.63               | 32.53    | 36.14    |
| Underlying disease              | Hypertension    |          |          | Non-hypertension    |          |          | Hypertension    |          |          | Non-hypertension    |          |          |
| Mean slope                      | -0.05603        | -0.09166 | -0.02140 | -0.04329            | -0.11563 | -0.6335  | -0.09309        | -0.05636 | 0.01554  | -0.08785            | -0.04186 | 0.15694  |
| Num. of positive slopes         | 5               | 3        | 4        | 11                  | 20       | 12       | 39              | 48       | 53       | 25                  | 47       | 45       |
| Num. of negative slopes         | 11              | 13       | 12       | 38                  | 29       | 37       | 55              | 46       | 41       | 47                  | 25       | 27       |
| % of negative slopes            | 68.75           | 81.25    | 75.00    | 77.55               | 59.18    | 75.51    | 58.51           | 48.94    | 43.62    | 65.28               | 34.72    | 37.50    |
| Underlying disease              | Age             |          |          | Non-age             |          |          | Age             |          |          | Non-age             |          |          |
| Mean slope                      | -0.06055        | -0.15182 | -0.37490 | -0.03640            | -0.07982 | -0.55950 | -0.04493        | -0.00005 | -0.06980 | -0.13052            | -0.09335 | 0.20373  |
| Num. of positive slopes         | 6               | 9        | 7        | 10                  | 14       | 9        | 36              | 51       | 43       | 28                  | 44       | 55       |
| Num. of negative slopes         | 21              | 18       | 20       | 28                  | 24       | 29       | 41              | 26       | 34       | 61                  | 45       | 34       |
| % of negative slopes            | 77.78           | 66.67    | 74.07    | 73.68               | 63.16    | 76.32    | 53.25           | 33.77    | 44.16    | 68.54               | 50.56    | 38.20    |
| Underlying disease              | Ultrafiltration |          |          | Non-ultrafiltration |          |          | Ultrafiltration |          |          | Non-ultrafiltration |          |          |
| Mean slope                      | -0.03183        | -0.12635 | -0.83020 | -0.07927            | -0.07232 | 0.29893  | -0.10334        | -0.15194 | -0.24260 | -0.06623            | 0.15002  | 0.70434  |
| Num. of positive slopes         | 11              | 15       | 6        | 5                   | 8        | 10       | 41              | 56       | 55       | 23                  | 39       | 43       |
| Num. of negative slopes         | 34              | 30       | 39       | 15                  | 12       | 10       | 69              | 54       | 55       | 33                  | 17       | 13       |
| % of negative slopes            | 75.56           | 66.67    | 86.67    | 75.00               | 60.00    | 50.00    | 62.73           | 49.09    | 50.00    | 58.93               | 30.36    | 23.21    |

**Table S2.** HR slope values for IDH and normal (non-IDH) patients according to patient baseline information 45 min before IDH onset

|                                 | Hypotension     |              |        |                     |              |        | Normal          |          |         |                     |              |        |
|---------------------------------|-----------------|--------------|--------|---------------------|--------------|--------|-----------------|----------|---------|---------------------|--------------|--------|
|                                 | 45min           | 20min        | 10min  | 45min               | 20min        | 10min  | 45min           | 20min    | 10min   | 45min               | 20min        | 10min  |
| Underlying disease <sup>1</sup> | Diabetes        |              |        | Non-diabetes        |              |        | Diabetes        |          |         | Non-diabetes        |              |        |
| Mean slope                      | -0.00688        | -0.07913     | -0.395 | -0.22461            | -0.66304     | -1.333 | -0.04726        | 0.0050   | 0.3648  | -0.11348            | -0.01303     | -0.053 |
| Num. of positive slopes         | 20              | 20           | 15     | 8                   | 8            | 11     | 81              | 82       | 105     | 63                  | 88           | 99     |
| Num. of negative slopes         | 39              | 39           | 44     | 17                  | 17           | 14     | 102             | 101      | 78      | 108                 | 83           | 72     |
| % of negative slopes            | 66.10           | 66.10        | 74.58  | 68                  | 68           | 56     | 55.74           | 55.19    | 42.62   | 63.16               | 48.54        | 42.11  |
| Underlying disease              | Hypertension    |              |        | Non-hypertension    |              |        | Hypertension    |          |         | Non-hypertension    |              |        |
| Mean slope                      | -0.05687        | 0.09416<br>7 | -0.076 | -0.08126            | -0.47749     | -0.061 | -0.06936        | -0.03107 | -0.019  | -0.09473            | 0.03910<br>3 | 0.448  |
| Num. of positive slopes         | 13              | 11           | 15     | 15                  | 17           | 11     | 84              | 89       | 114     | 60                  | 81           | 90     |
| Num. of negative slopes         | 20              | 22           | 18     | 36                  | 34           | 40     | 132             | 127      | 102     | 78                  | 57           | 48     |
| % of negative slopes            | 60.61           | 66.67        | 54.55  | 70.59               | 66.67        | 78.43  | 61.11           | 58.80    | 47.22   | 56.52               | 41.30        | 34.78  |
| Underlying disease              | Age             |              |        | Non-age             |              |        | Age             |          |         | Non-age             |              |        |
| Mean slope                      | -0.1150         | -0.2413      | -0.628 | -0.03588            | -0.26254     | -0.712 | -0.0714         | -0.13159 | -0.0527 | -0.08626            | 0.11049      | 0.356  |
| Num. of positive slopes         | 13              | 12           | 14     | 15                  | 16           | 12     | 66              | 86       | 90      | 78                  | 84           | 114    |
| Num. of negative slopes         | 25              | 26           | 24     | 31                  | 30           | 34     | 101             | 81       | 77      | 109                 | 103          | 73     |
| % of negative slopes            | 65.79           | 68.42        | 63.16  | 67.39               | 65.22        | 73.91  | 60.48           | 48.50    | 46.11   | 58.29               | 55.08        | 39.04  |
| Underlying disease              | Ultrafiltration |              |        | Non-ultrafiltration |              |        | Ultrafiltration |          |         | Non-ultrafiltration |              |        |
| Mean slope                      | -0.04305        | -0.41123     | -1.044 | -0.12895            | 0.06372<br>2 | 0.0654 | -0.08773        | -0.17807 | -0.074  | -0.06229            | 0.34499<br>8 | 0.6382 |
| Num. of positive slopes         | 18              | 15           | 14     | 10                  | 13           | 12     | 88              | 101      | 130     | 56                  | 69           | 74     |
| Num. of negative slopes         | 38              | 41           | 42     | 18                  | 15           | 16     | 148             | 135      | 106     | 62                  | 49           | 44     |
| % of negative slopes            | 67.86           | 73.21        | 75     | 64.29               | 53.57        | 57.14  | 62.71           | 57.20    | 44.92   | 52.54               | 41.53        | 37.29  |
